# Supplementary material
Source: publisher figshare collection journal article supplement (https://plos.figshare.com/articles/dataset/_/4925690)
Supplement: Supplementary file [file 1]

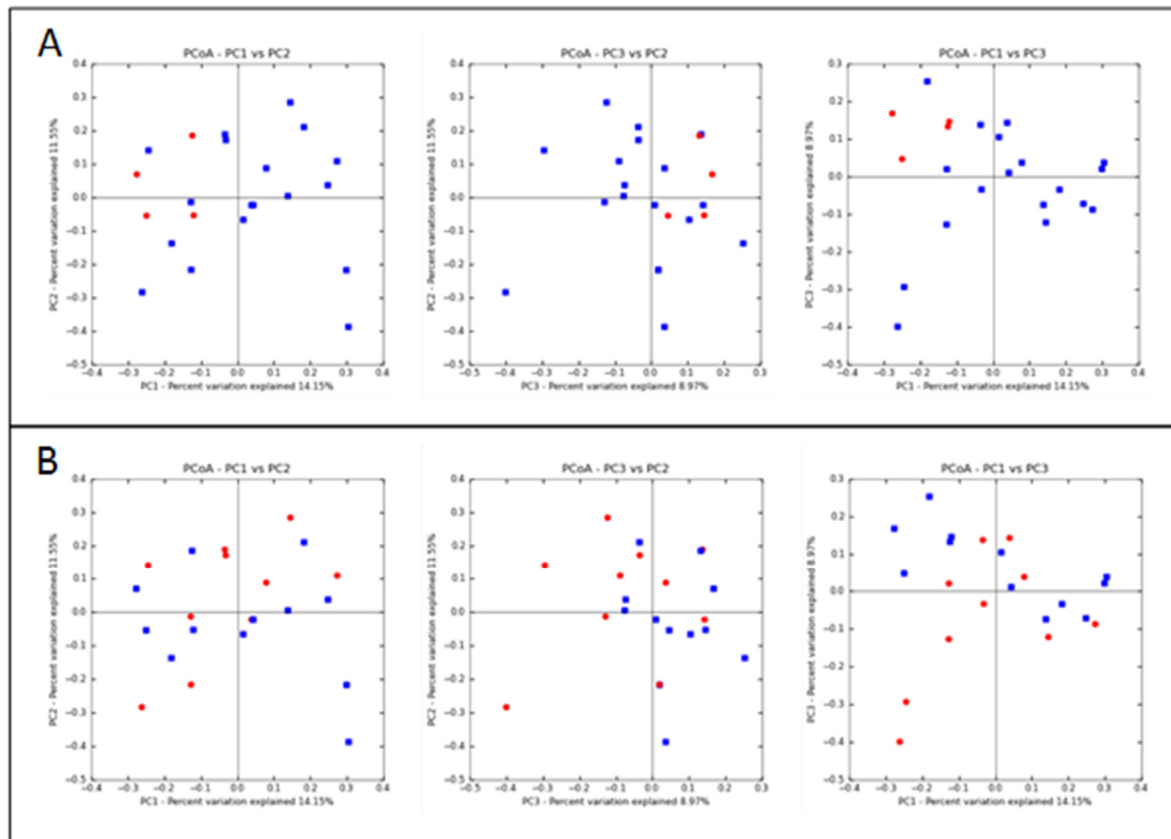

**S1 Fig. (Panel A):** Principal Coordinate Analysis of unweighted UniFrac distances of 16S rRNA genes representing the difference in microbial communities (i.e., beta diversity) between large breed (red circles) and small breed dogs (blue squares) at 2 days of age. **(Panel B):** Principal Coordinate Analysis of unweighted UniFrac distances of 16S rRNA genes representing the difference in microbial communities (i.e., beta diversity) between no future antibiotic administration (red circles) and future antibiotic administration (blue squares) at 2 days of age.
